# Supplementary material for: Blue Light-Induced Retinal Neuronal Injury and Amelioration by Commercially Available Blue Light-Blocking Lenses
Source: MDPI journal article supplement (doi:10.3390/life12020243), 2022-02-07
Supplement: s1 [file s1]

# Blue Light-Induced Retinal Neuronal Injury and Amelioration by Commercially Available Blue Light-Blocking Lenses

Nagarajan Theruveethi <sup>1</sup>, Bang Viet Bui <sup>2</sup>, Manjunath B. Joshi <sup>3</sup>, Manna Valiathan <sup>4</sup>,  
Shonraj Ballae Ganeshrao <sup>1</sup>, Sivakumar Gopalakrishnan <sup>4</sup>, Shama Prasada Kabekkodu <sup>3</sup>,  
Shailaja S. Bhat <sup>4</sup> and Sudarshan Surendran <sup>5,\*</sup>

## Supplementary Materials

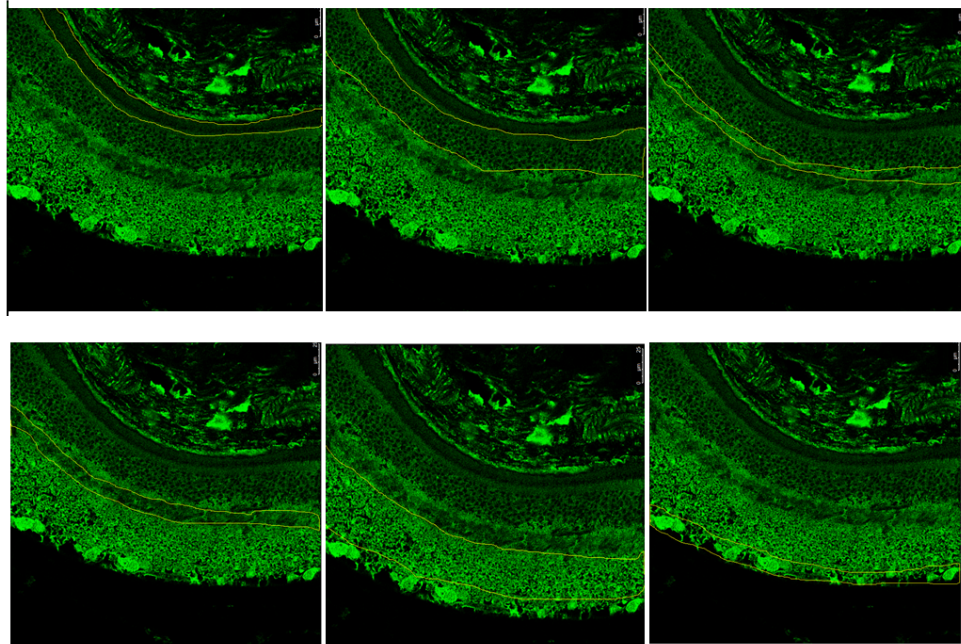

**Figure S1.** Illustration of segmentation of retinal layer for quantification of fluorescence intensity. To account for background fluorescence, each layer is expressed relative (%) to the average brightness of the entire retina.

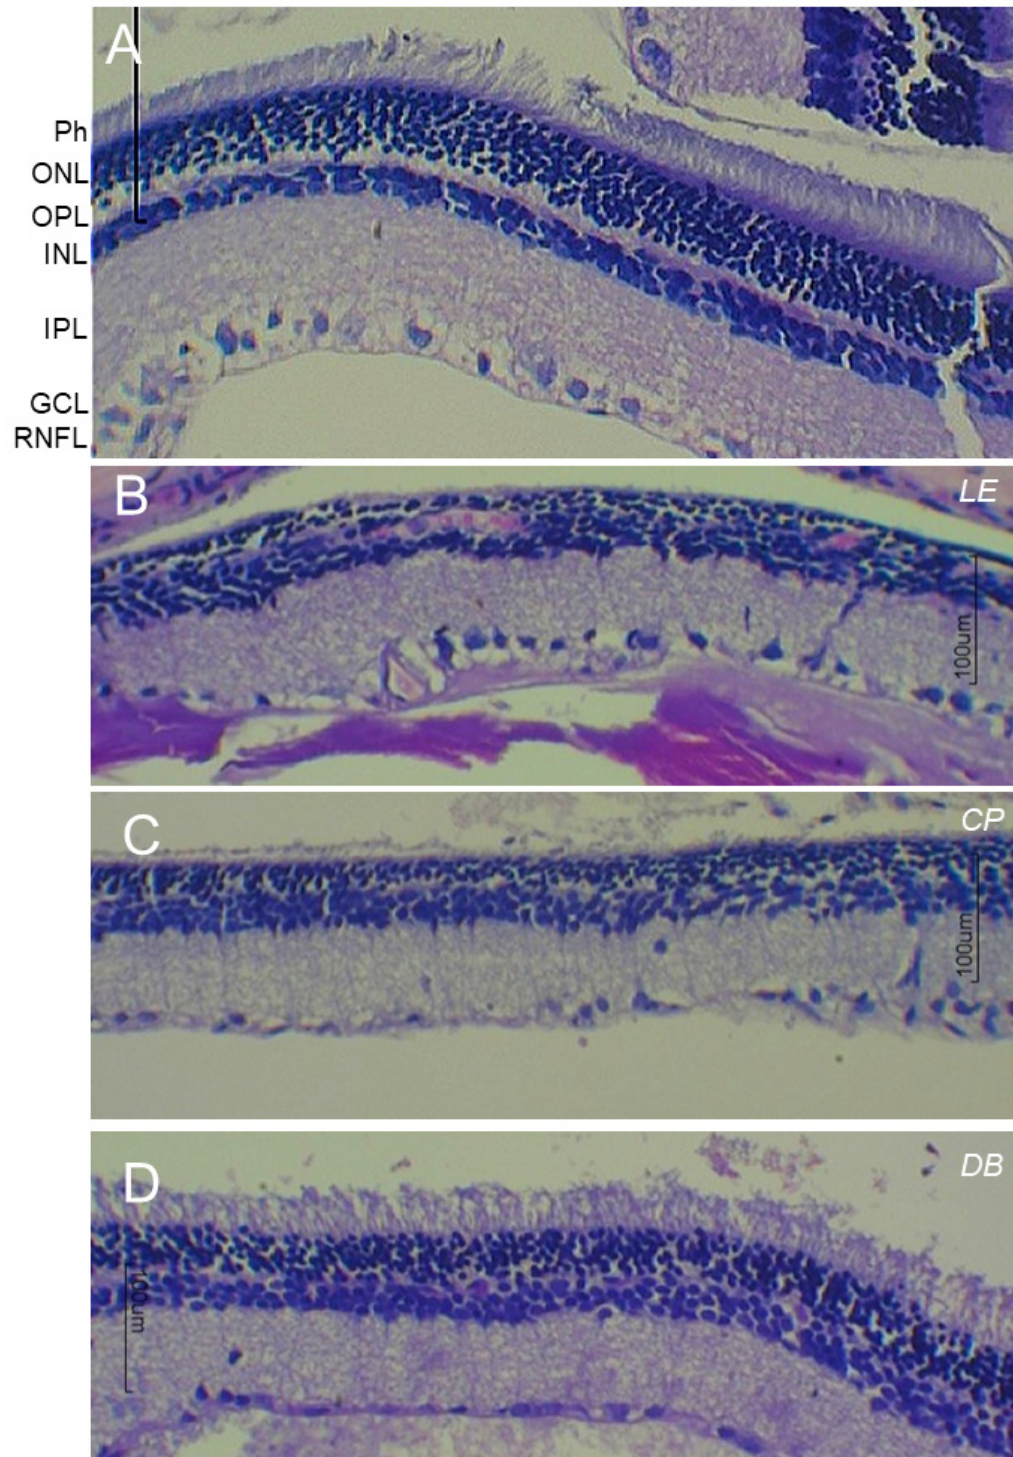

**Figure S2.** Large images of retinal cross section shown in Figure 3 for a normal control (NC, **A**), blue light exposure (LE, **B**) and lens protection (CP and DB, **C** and **D**) groups after 28 days of light exposure. Scale bar = 100 μm. Photoreceptor, Ganglion cell layer (GCL), inner nuclear layer (INL), inner plexiform layer (IPL), outer plexiform layer (OPL), and outer nuclear layer (ONL), retinal nerve fiber layer (RNFL).
